# Supplementary material for: Chaetoglobosin A induces apoptosis in T-24 human bladder cancer cells through oxidative stress and MAPK/PI3K-AKT-mTOR pathway
Source: PeerJ journal article supplement (doi:10.7717/peerj.19085), 2025-03-31
Supplement: Rawdata.zip [file 6.2t24.xls]

## Sheet: Raw Data{Wavelength-490.0}
Raw Data{Wavelength:490.0}
	1	2	3	4	5	6	7	8	9	10	11	12
A	0.04	0.041	0.041	0.041	0.04	0.04	0.04	0.039	0.039	0.04	0.04	0.04
B	0.039	0.601	0.745	0.544	0.747	0.83	0.04	0.04	0.04	0.04	0.041	0.039
C	0.04	0.666	0.6	0.738	0.636	0.809	0.041	0.04	0.04	0.04	0.04	0.04
D	0.032	0.639	0.535	0.548	0.484	0.595	0.04	0.039	0.039	0.04	0.039	0.042
E	0.037	0.481	0.459	0.45	0.339	0.34	0.043	0.043	0.043	0.044	0.043	0.044
F	0.034	0.244	0.179	0.244	0.18	0.202	0.038	0.04	0.04	0.04	0.041	0.039
G	0.034	0.111	0.107	0.105	0.109	0.124	0.043	0.041	0.04	0.04	0.04	0.04
H	0.037	0.034	0.038	0.038	0.038	0.039	0.04	0.039	0.038	0.04	0.038	0.039
				OD				AV				IC50
0	0.745	0.747	0.83	0.774	0.962532	0.965116	1.07235	1	0			47.23			0.962532	0.965116	1.07235	96.2532	96.5116	107.235
12.5	0.666	0.6	0.636	0.634	0.860465	0.775194	0.821705	0.819121	0.180879						0.860465	0.775194	0.821705	86.0465	77.5194	82.1705
25	0.535	0.548	0.595	0.559333	0.691214	0.70801	0.768734	0.722653	0.277347						0.691214	0.70801	0.768734	69.1214	70.801	76.8734
50	0.481	0.459	0.45	0.463333	0.621447	0.593023	0.581395	0.598622	0.401378						0.621447	0.593023	0.581395	62.1447	59.3023	58.1395
75	0.244	0.244	0.202	0.23	0.315245	0.315245	0.260982	0.297158	0.702842						0.315245	0.315245	0.260982	31.5245	31.5245	26.0982
100	0.107	0.105	0.109	0.107	0.138243	0.135659	0.140827	0.138243	0.861757						0.138243	0.135659	0.140827	13.8243	13.5659	14.0827
