# Supplementary material for: Chaetoglobosin A induces apoptosis in T-24 human bladder cancer cells through oxidative stress and MAPK/PI3K-AKT-mTOR pathway
Source: PeerJ journal article supplement (doi:10.7717/peerj.19085), 2025-03-31
Supplement: Rawdata.zip [file 10.18 t24 490.xls]

## Sheet: Raw Data{Wavelength-490.0}
Raw Data{Wavelength:490.0}
	1	2	3	4	5	6	7	8	9	10	11	12
A	0.04	0.044	0.04	0.04	0.04	0.041	0.041	0.039	0.039	0.041	0.039	0.04
B	0.035	0.433	0.672	0.602	0.565	0.56	0.035	0.04	0.04	0.04	0.039	0.039
C	0.047	0.358	0.34	0.356	0.403	0.481	0.046	0.04	0.04	0.039	0.039	0.039
D	0.036	0.415	0.292	0.433	0.409	0.453	0.035	0.039	0.039	0.039	0.039	0.039
E	0.023	0.053	0.052	0.056	0.051	0.057	0.023	0.043	0.043	0.043	0.043	0.043
F	0.046	0.09	0.073	0.08	0.078	0.078	0.043	0.039	0.04	0.04	0.039	0.039
G	0.048	0.334	0.44	0.349	0.453	0.44	0.033	0.039	0.04	0.04	0.04	0.04
H	0.039	0.036	0.035	0.035	0.035	0.034	0.035	0.039	0.04	0.039	0.039	0.039
				OD								IC50
0	0.602	0.565	0.56	0.575667	1.04574	0.981471	0.972785	1	0			58.95			1.04574	0.981471	0.972785	104.574	98.1471	97.2785
25	0.356	0.403	0.481	0.413333	0.618413	0.700058	0.835553	0.718008	0.281992						0.618413	0.700058	0.835553	61.8413	70.0058	83.5553
50	0.433	0.409	0.453	0.431667	0.752171	0.710481	0.786914	0.749855	0.250145						0.752171	0.710481	0.786914	75.2171	71.0481	78.6914
100	0.056	0.051	0.057	0.0546667	0.0972785	0.0885929	0.0990156	0.0949624	0.905038						0.0972785	0.0885929	0.0990156	9.72785	8.85929	9.90156
200	0.08	0.078	0.078	0.0786667	0.138969	0.135495	0.135495	0.136653	0.863347						0.138969	0.135495	0.135495	13.8969	13.5495	13.5495
5f	0.44	0.453	0.44	0.444333	0.764331	0.786914	0.764331	0.771859	0.228141						0.764331	0.786914	0.764331	76.4331	78.6914	76.4331
