# Supplementary material for: Chaetoglobosin A induces apoptosis in T-24 human bladder cancer cells through oxidative stress and MAPK/PI3K-AKT-mTOR pathway
Source: PeerJ journal article supplement (doi:10.7717/peerj.19085), 2025-03-31
Supplement: Rawdata.zip [file 10.26 t24 a375 24h 570.xls]

## Sheet: Raw Data{Wavelength-570.0}
Raw Data{Wavelength:570.0}
	1	2	3	4	5	6	7	8	9	10	11	12
A	0.041	0.041	0.04	0.043	0.042	0.046	0.049	0.051	0.056	0.058	0.063	0.065
B	0.033	0.638	0.641	0.621	0.64	0.696	0.753	0.761	0.797	0.817	0.755	0.106
C	0.042	0.575	0.583	0.575	0.599	0.656	0.704	0.719	0.706	0.695	0.748	0.122
D	0.035	0.54	0.54	0.557	0.561	0.627	0.692	0.692	0.718	0.702	0.719	0.123
E	0.023	0.545	0.534	0.567	0.579	0.632	0.616	0.622	0.618	0.63	0.645	0.113
F	0.046	0.208	0.222	0.235	0.239	0.24	0.287	0.28	0.298	0.311	0.313	0.127
G	0.035	0.513	0.514	0.498	0.522	0.467	0.518	0.611	0.665	0.683	0.67	0.094
H	0.034	0.035	0.034	0.036	0.038	0.039	0.04	0.042	0.042	0.044	0.045	0.046
a375				OD							ic50
0	0.753	0.761	0.755	0.756333	0.995593	1.00617	0.998237	1	0		84.16		0.995593	1.00617	0.998237	99.5593	100.617	99.8237
12.5	0.704	0.719	0.706	0.709667	0.930807	0.950639	0.933451	0.938299	0.0617012				0.930807	0.950639	0.933451	93.0807	95.0639	93.3451
25	0.692	0.692	0.702	0.695333	0.914941	0.914941	0.928162	0.919348	0.0806523				0.914941	0.914941	0.928162	91.4941	91.4941	92.8162
50	0.616	0.622	0.618	0.618667	0.814456	0.822389	0.8171	0.817981	0.182019				0.814456	0.822389	0.8171	81.4456	82.2389	81.71
100	0.287	0.28	0.298	0.288333	0.379462	0.370207	0.394006	0.381225	0.618775				0.379462	0.370207	0.394006	37.9462	37.0207	39.4006
5f	0.611	0.665	0.683	0.653	0.807845	0.879242	0.903041	0.863376	0.136624
t24
0	0.638	0.641	0.64	0.639667	0.997394	1.00208	1.00052	1	0		83.82		0.997394	1.00208	1.00052	99.7394	100.208	100.052
12.5	0.575	0.583	0.575	0.577667	0.898906	0.911412	0.898906	0.903075	0.0969255				0.898906	0.911412	0.898906	89.8906	91.1412	89.8906
25	0.54	0.557	0.561	0.552667	0.84419	0.870766	0.877019	0.863992	0.136008				0.84419	0.870766	0.877019	84.419	87.0766	87.7019
50	0.545	0.534	0.567	0.548667	0.852006	0.83481	0.886399	0.857738	0.142262				0.852006	0.83481	0.886399	85.2006	83.481	88.6399
100	0.222	0.235	0.239	0.232	0.347056	0.367379	0.373632	0.362689	0.637311				0.347056	0.367379	0.373632	34.7056	36.7379	37.3632
5f	0.513	0.514	0.498	0.508333	0.80198	0.803544	0.77853	0.794685	0.205315
