# Supplementary material for: Chaetoglobosin A induces apoptosis in T-24 human bladder cancer cells through oxidative stress and MAPK/PI3K-AKT-mTOR pathway
Source: PeerJ journal article supplement (doi:10.7717/peerj.19085), 2025-03-31
Supplement: Rawdata.zip [file 11.28.pdf › Chaetoglobosin A induces T-24 apoptosis in human bladder cancer/5.cells cycle/11.28.pdf]

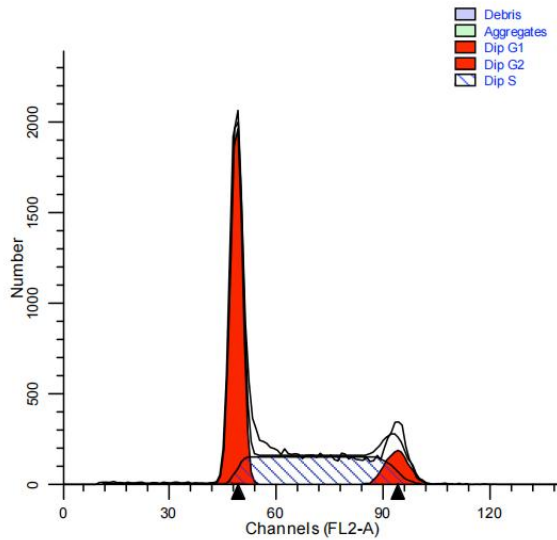

Diploid: 100.00 %  
 Dip G1: 49.26 % at 48.68  
 Dip G2: 9.23 % at 93.76  
 Dip S: 41.51 % G2/G1: 1.93  
 %CV: 3.43

Total S-Phase: 41.51 %  
 Total B.A.D.: 0.92 %

Apoptosis: % Mean:

Debris: 2.66 %  
 Aggregates: 0.28 %  
 Modeled events: 17844  
 All cycle events: 17319  
 Cycle events per channel: 376  
 RCS: 4.268

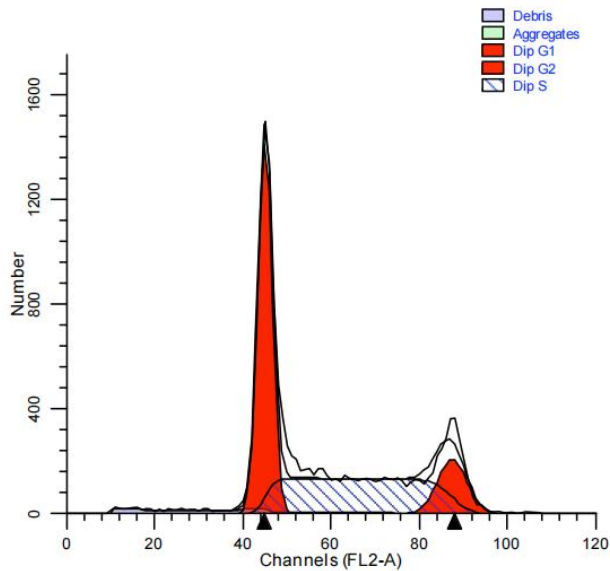

Diploid: 100.00 %  
 Dip G1: 45.01 % at 45.12  
 Dip G2: 13.16 % at 87.49  
 Dip S: 41.83 % G2/G1: 1.94  
 %CV: 3.70

Total S-Phase: 41.83 %  
 Total B.A.D.: 2.06 %

Apoptosis: % Mean:

Debris: 5.46 %  
 Aggregates: 0.17 %  
 Modeled events: 14190  
 All cycle events: 13391  
 Cycle events per channel: 309  
 RCS: 4.029

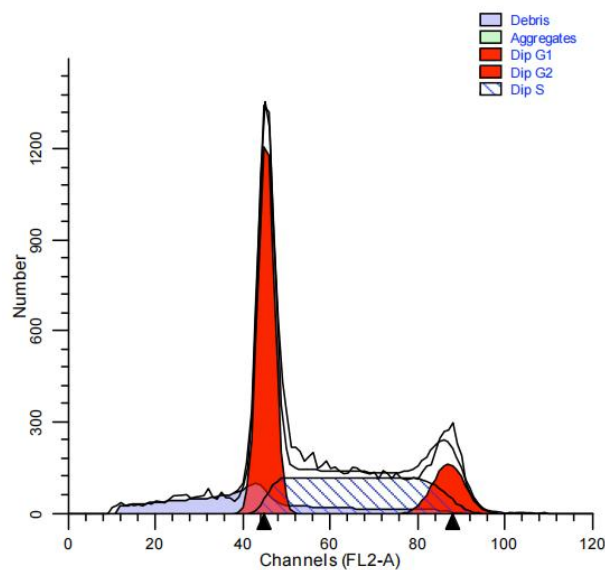

Diploid: 100.00 %  
 Dip G1: 47.06 % at 45.41  
 Dip G2: 12.42 % at 87.13  
 Dip S: 40.52 % G2/G1: 1.92  
 %CV: 4.11

Total S-Phase: 40.52 %  
 Total B.A.D.: 9.34 %

Apoptosis: % Mean:

Debris: 18.43 %  
 Aggregates: 0.25 %  
 Modeled events: 15350  
 All cycle events: 12483  
 Cycle events per channel: 292  
 RCS: 3.657

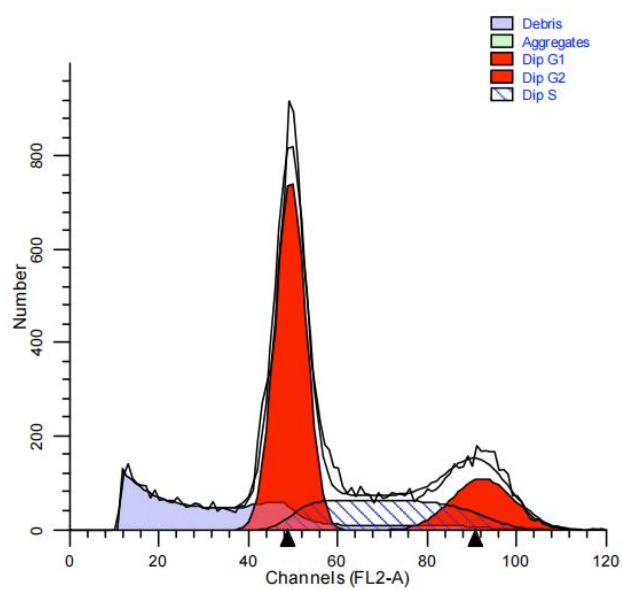

Diploid: 100.00 %  
 Dip G1: 58.19 % at 49.55  
 Dip G2: 17.39 % at 92.43  
 Dip S: 24.43 % G2/G1: 1.87  
 %CV: 7.04

Total S-Phase: 24.43 %  
 Total B.A.D.: 7.86 %

Debris: 21.66 %  
 Aggregates: 0.15 %  
 Modeled events: 14389  
 All cycle events: 11251  
 Cycle events per channel: 256  
 RCS: 2.596
