# Supplementary material for: Chaetoglobosin A induces apoptosis in T-24 human bladder cancer cells through oxidative stress and MAPK/PI3K-AKT-mTOR pathway
Source: PeerJ journal article supplement (doi:10.7717/peerj.19085), 2025-03-31
Supplement: Rawdata.zip [file FITC-PI-ana-10.pdf › Chaetoglobosin A induces T-24 apoptosis in human bladder cancer/3.apoptosis/2 times/20221107/FITC-PI-ana-10.pdf]

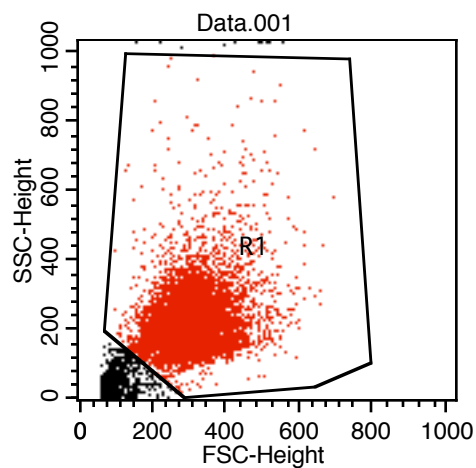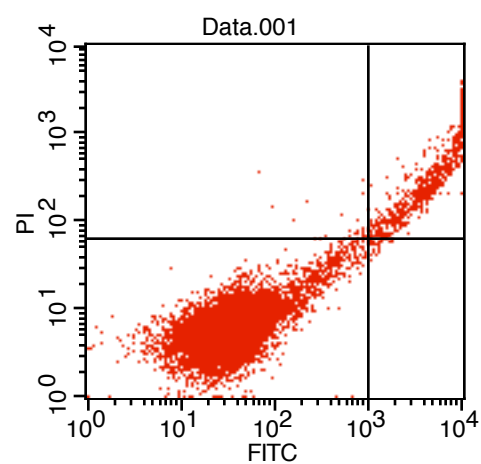

File: Data.001

| Quad | Events | % Gated | % Total |
|------|--------|---------|---------|
| UL   | 23     | 0.25    | 0.23    |
| UR   | 668    | 7.22    | 6.68    |
| LL   | 8534   | 92.23   | 85.34   |
| LR   | 28     | 0.30    | 0.28    |

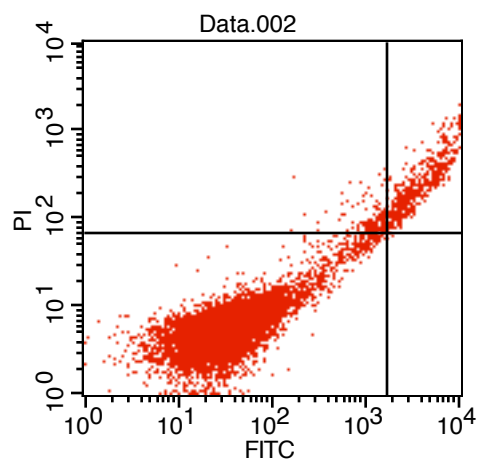

File: Data.002

| Quad | Events | % Gated | % Total |
|------|--------|---------|---------|
| UL   | 156    | 1.69    | 1.56    |
| UR   | 515    | 5.59    | 5.15    |
| LL   | 8536   | 92.69   | 85.36   |
| LR   | 2      | 0.02    | 0.02    |

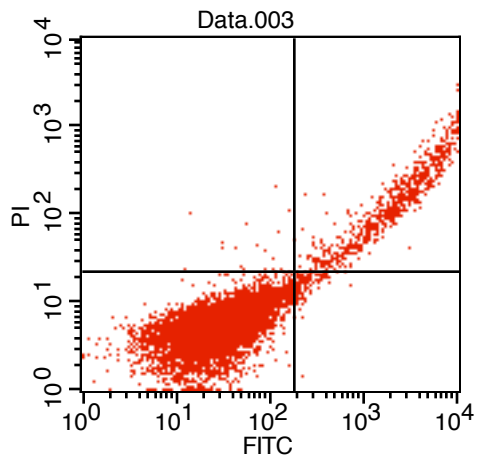

File: Data.003

| Quad | Events | % Gated | % Total |
|------|--------|---------|---------|
| UL   | 21     | 0.22    | 0.21    |
| UR   | 704    | 7.39    | 7.04    |
| LL   | 8669   | 91.00   | 86.69   |
| LR   | 132    | 1.39    | 1.32    |

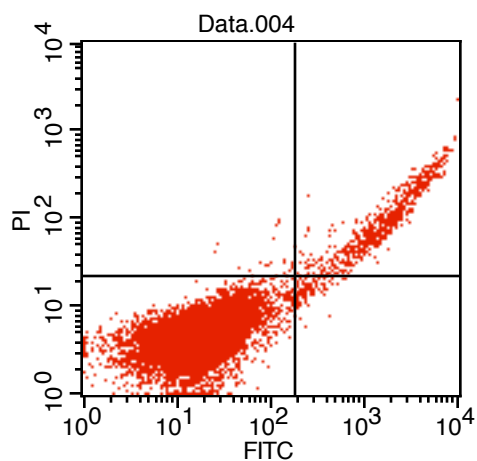

File: Data.004

| Quad | Events | % Gated | % Total |
|------|--------|---------|---------|
| UL   | 21     | 0.23    | 0.21    |
| UR   | 666    | 7.21    | 6.66    |
| LL   | 8450   | 91.45   | 84.50   |
| LR   | 103    | 1.11    | 1.03    |

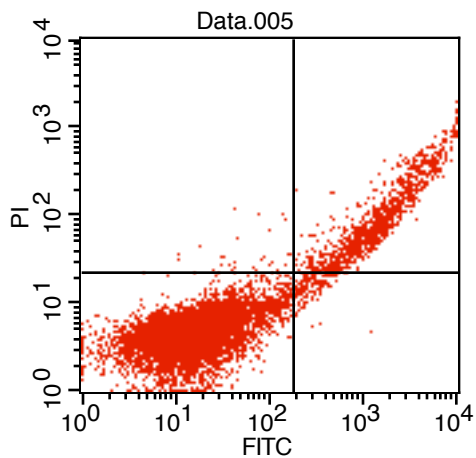

File: Data.005

| Quad | Events | % Gated | % Total |
|------|--------|---------|---------|
| UL   | 30     | 0.36    | 0.30    |
| UR   | 1249   | 15.00   | 12.49   |
| LL   | 6906   | 82.93   | 69.06   |
| LR   | 143    | 1.72    | 1.43    |

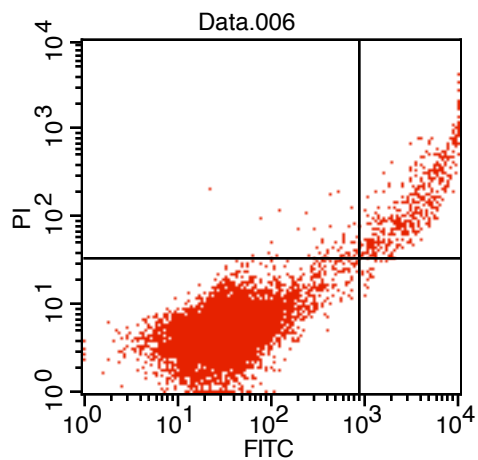

File: Data.006

| Quad | Events | % Gated | % Total |
|------|--------|---------|---------|
| UL   | 56     | 0.58    | 0.56    |
| UR   | 455    | 4.72    | 4.55    |
| LL   | 9114   | 94.50   | 91.14   |
| LR   | 19     | 0.20    | 0.19    |

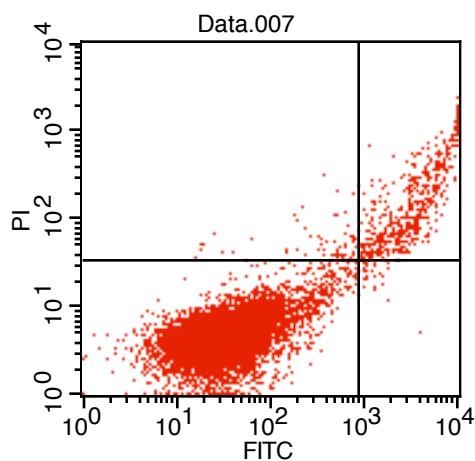

File: Data.007

| Quad | Events | % Gated | % Total |
|------|--------|---------|---------|
| UL   | 74     | 0.78    | 0.74    |
| UR   | 513    | 5.38    | 5.13    |
| LL   | 8909   | 93.51   | 89.09   |
| LR   | 31     | 0.33    | 0.31    |

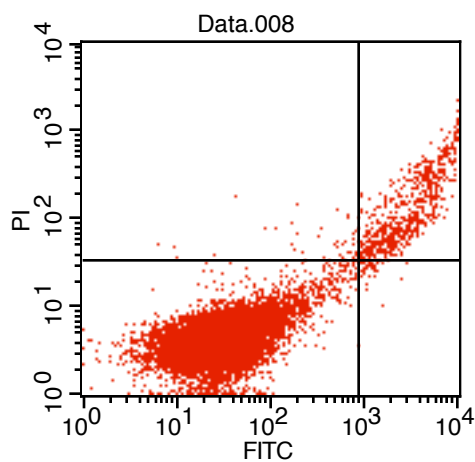

File: Data.008

| Quad | Events | % Gated | % Total |
|------|--------|---------|---------|
| UL   | 46     | 0.49    | 0.46    |
| UR   | 616    | 6.53    | 6.16    |
| LL   | 8742   | 92.63   | 87.42   |
| LR   | 34     | 0.36    | 0.34    |

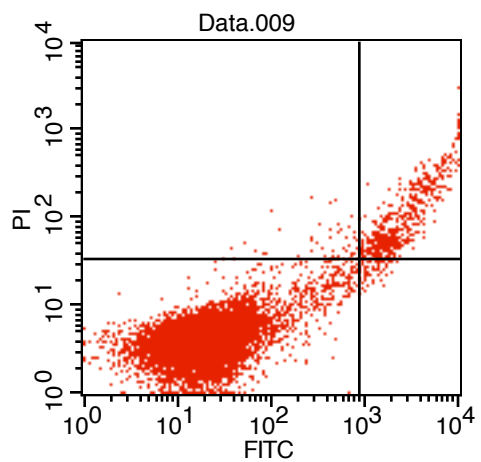

File: Data.009

| Quad | Events | % Gated | % Total |
|------|--------|---------|---------|
| UL   | 54     | 0.59    | 0.54    |
| UR   | 522    | 5.73    | 5.22    |
| LL   | 8473   | 92.98   | 84.73   |
| LR   | 64     | 0.70    | 0.64    |

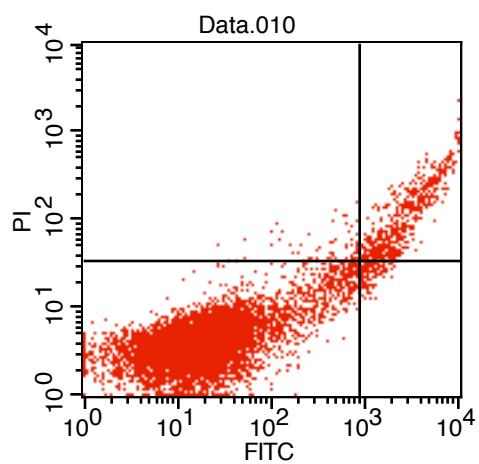

File: Data.010

| Quad | Events | % Gated | % Total |
|------|--------|---------|---------|
| UL   | 66     | 0.74    | 0.66    |
| UR   | 574    | 6.45    | 5.74    |
| LL   | 8107   | 91.05   | 81.07   |
| LR   | 157    | 1.76    | 1.57    |
