# Supplementary material for: Chaetoglobosin A induces apoptosis in T-24 human bladder cancer cells through oxidative stress and MAPK/PI3K-AKT-mTOR pathway
Source: PeerJ journal article supplement (doi:10.7717/peerj.19085), 2025-03-31
Supplement: Rawdata.zip [file FITC-PI-ana-17.pdf › Chaetoglobosin A induces T-24 apoptosis in human bladder cancer/3.apoptosis/2 times/20220516 diao/FITC-PI-ana-17.pdf]

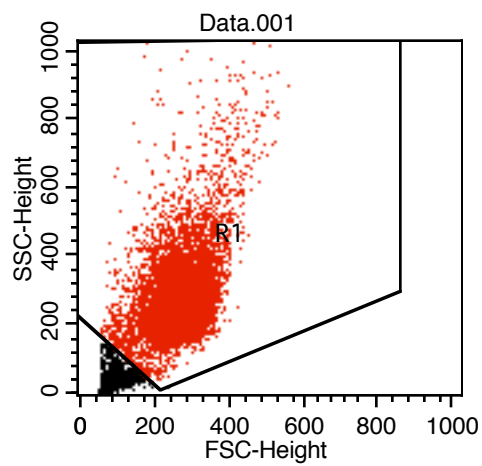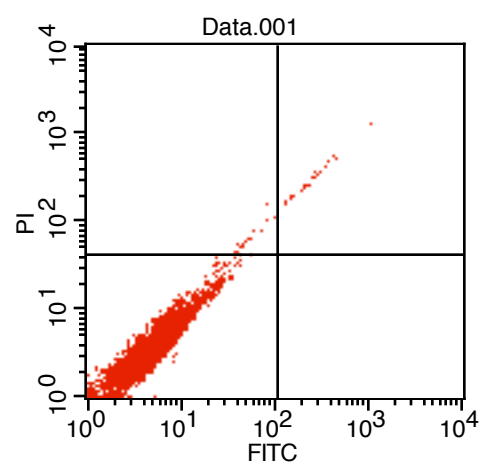

File: Data.001

| Quad | Events | % Gated | % Total |
|------|--------|---------|---------|
| UL   | 22     | 0.26    | 0.22    |
| UR   | 26     | 0.31    | 0.26    |
| LL   | 8292   | 99.42   | 82.92   |
| LR   | 0      | 0.00    | 0.00    |

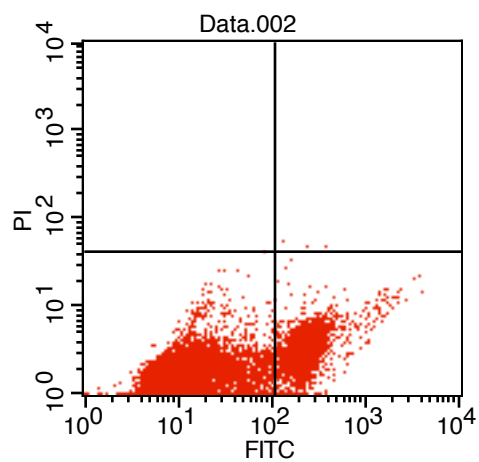

File: Data.002

| Quad | Events | % Gated | % Total |
|------|--------|---------|---------|
| UL   | 0      | 0.00    | 0.00    |
| UR   | 3      | 0.03    | 0.03    |
| LL   | 6963   | 77.99   | 69.63   |
| LR   | 1962   | 21.98   | 19.62   |

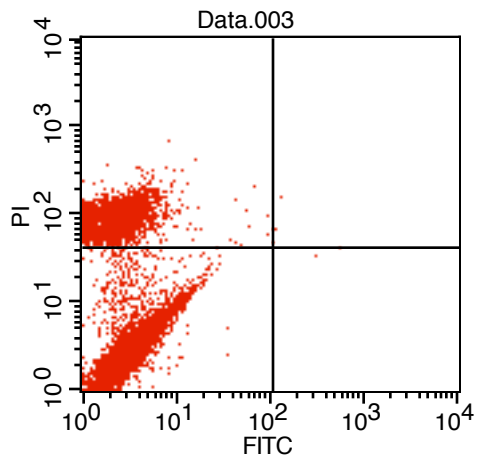

File: Data.003

| Quad | Events | % Gated | % Total |
|------|--------|---------|---------|
| UL   | 2736   | 30.75   | 27.36   |
| UR   | 4      | 0.04    | 0.04    |
| LL   | 6158   | 69.20   | 61.58   |
| LR   | 1      | 0.01    | 0.01    |

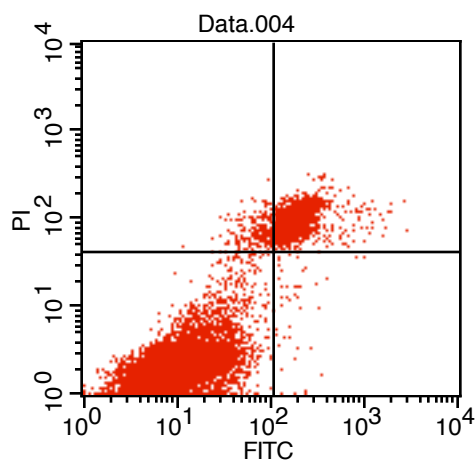

File: Data.004

| Quad | Events | % Gated | % Total |
|------|--------|---------|---------|
| UL   | 233    | 2.50    | 2.33    |
| UR   | 1225   | 13.16   | 12.25   |
| LL   | 7808   | 83.86   | 78.08   |
| LR   | 45     | 0.48    | 0.45    |

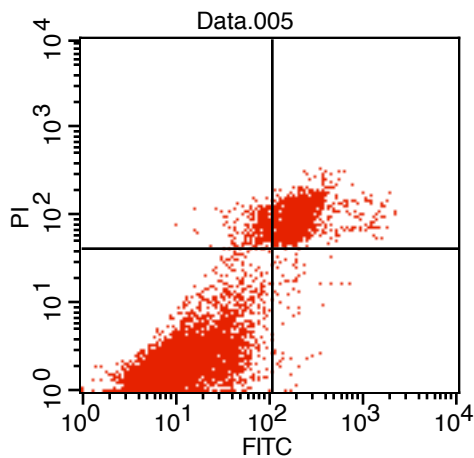

File: Data.005

| Quad | Events | % Gated | % Total |
|------|--------|---------|---------|
| UL   | 298    | 3.28    | 2.98    |
| UR   | 1759   | 19.36   | 17.59   |
| LL   | 6970   | 76.71   | 69.70   |
| LR   | 59     | 0.65    | 0.59    |

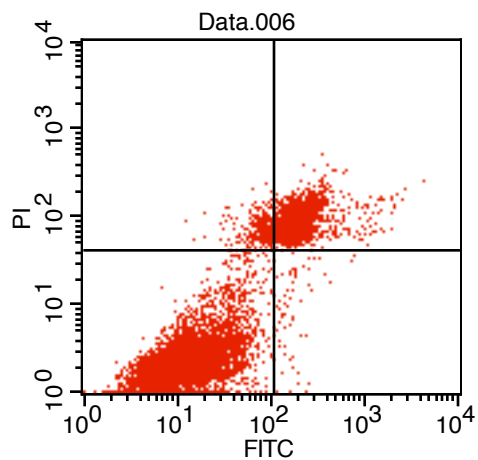

File: Data.006

| Quad | Events | % Gated | % Total |
|------|--------|---------|---------|
| UL   | 284    | 3.16    | 2.84    |
| UR   | 1887   | 21.01   | 18.87   |
| LL   | 6743   | 75.09   | 67.43   |
| LR   | 66     | 0.73    | 0.66    |

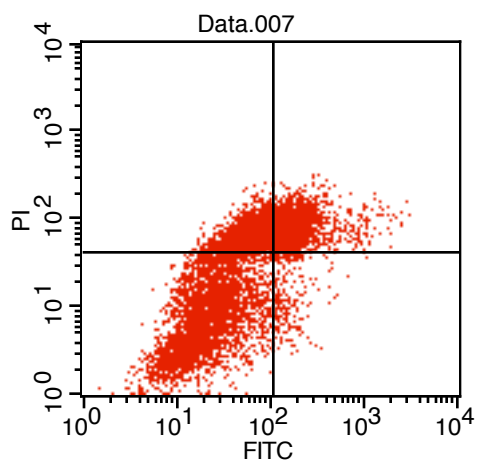

File: Data.007

| Quad | Events | % Gated | % Total |
|------|--------|---------|---------|
| UL   | 2393   | 25.55   | 23.93   |
| UR   | 2689   | 28.71   | 26.89   |
| LL   | 4011   | 42.83   | 40.11   |
| LR   | 273    | 2.91    | 2.73    |

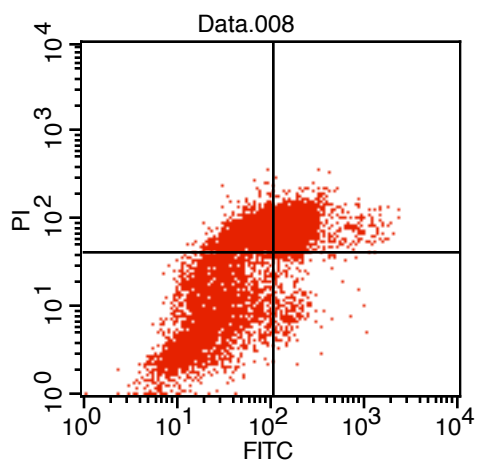

File: Data.008

| Quad | Events | % Gated | % Total |
|------|--------|---------|---------|
| UL   | 2387   | 25.72   | 23.87   |
| UR   | 2849   | 30.70   | 28.49   |
| LL   | 3709   | 39.97   | 37.09   |
| LR   | 335    | 3.61    | 3.35    |

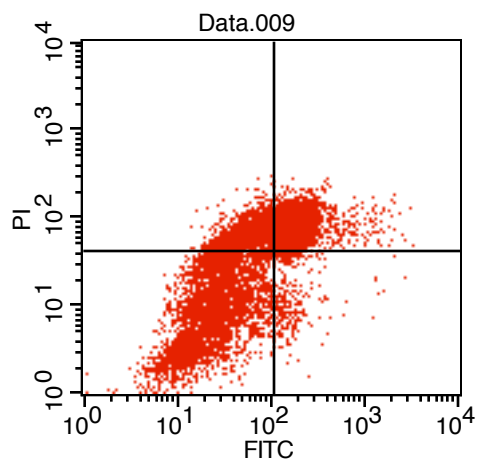

File: Data.009

| Quad | Events | % Gated | % Total |
|------|--------|---------|---------|
| UL   | 2299   | 24.95   | 22.99   |
| UR   | 2882   | 31.27   | 28.82   |
| LL   | 3688   | 40.02   | 36.88   |
| LR   | 347    | 3.77    | 3.47    |

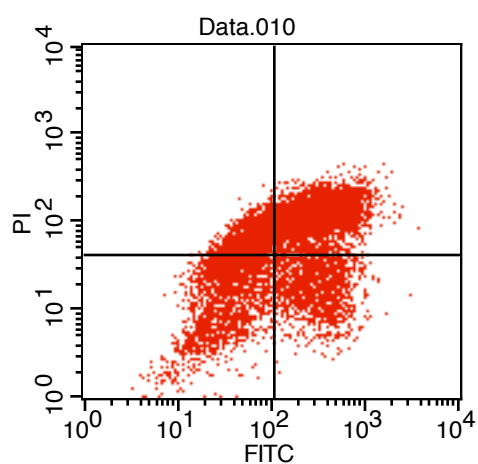

File: Data.010

| Quad | Events | % Gated | % Total |
|------|--------|---------|---------|
| UL   | 1801   | 18.98   | 18.01   |
| UR   | 3977   | 41.91   | 39.77   |
| LL   | 2210   | 23.29   | 22.10   |
| LR   | 1502   | 15.83   | 15.02   |

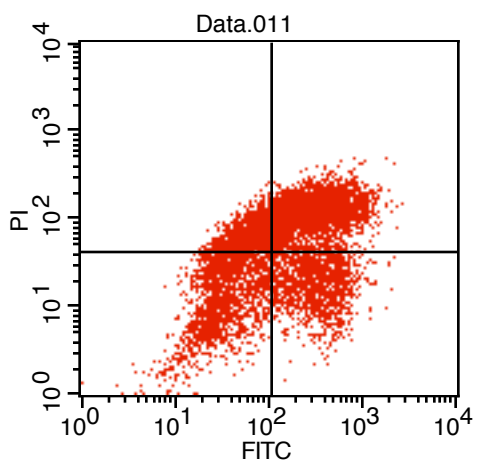

File: Data.011

| Quad | Events | % Gated | % Total |
|------|--------|---------|---------|
| UL   | 1811   | 19.07   | 18.11   |
| UR   | 3950   | 41.59   | 39.50   |
| LL   | 2152   | 22.66   | 21.52   |
| LR   | 1584   | 16.68   | 15.84   |

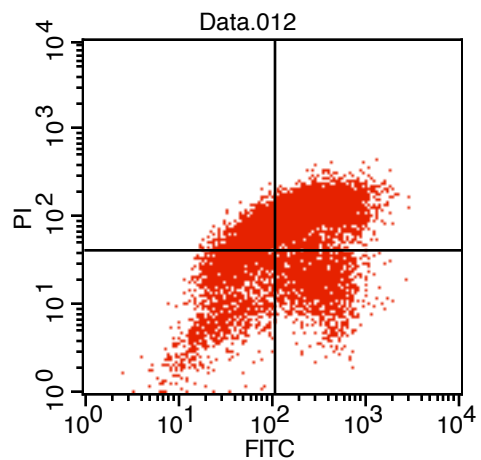

File: Data.012

| Quad | Events | % Gated | % Total |
|------|--------|---------|---------|
| UL   | 1806   | 19.09   | 18.06   |
| UR   | 3998   | 42.25   | 39.98   |
| LL   | 1985   | 20.98   | 19.85   |
| LR   | 1673   | 17.68   | 16.73   |

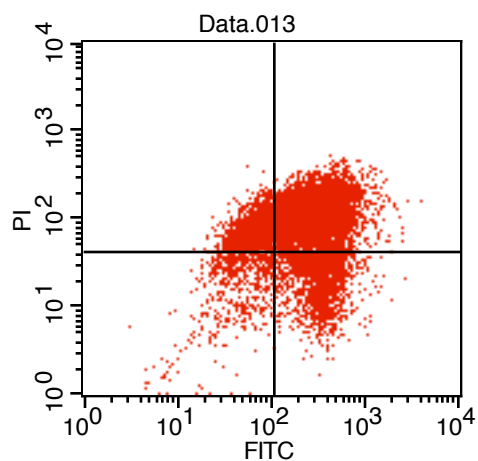

File: Data.013

| Quad | Events | % Gated | % Total |
|------|--------|---------|---------|
| UL   | 1581   | 16.68   | 15.81   |
| UR   | 5522   | 58.25   | 55.22   |
| LL   | 657    | 6.93    | 6.57    |
| LR   | 1720   | 18.14   | 17.20   |

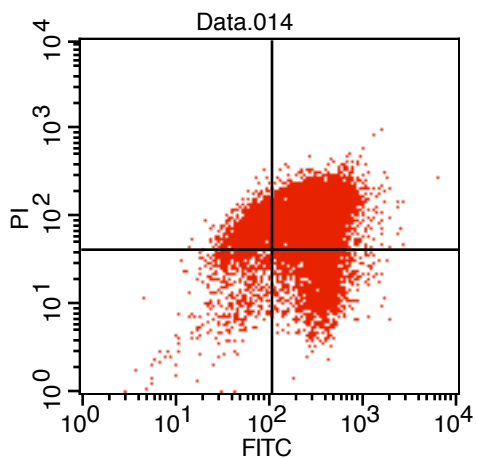

File: Data.014

| Quad | Events | % Gated | % Total |
|------|--------|---------|---------|
| UL   | 1491   | 15.88   | 14.91   |
| UR   | 5303   | 56.49   | 53.03   |
| LL   | 640    | 6.82    | 6.40    |
| LR   | 1954   | 20.81   | 19.54   |

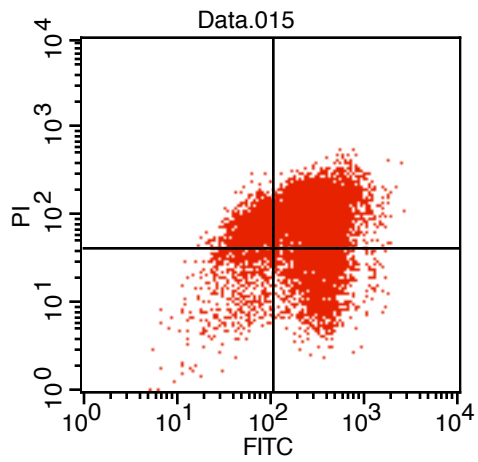

File: Data.015

| Quad | Events | % Gated | % Total |
|------|--------|---------|---------|
| UL   | 1467   | 15.85   | 14.67   |
| UR   | 5237   | 56.59   | 52.37   |
| LL   | 625    | 6.75    | 6.25    |
| LR   | 1926   | 20.81   | 19.26   |

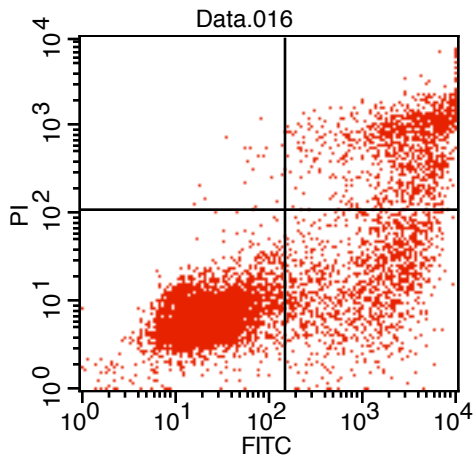

File: Data.016

| Quad | Events | % Gated | % Total |
|------|--------|---------|---------|
| UL   | 18     | 0.20    | 0.18    |
| UR   | 1242   | 13.98   | 12.42   |
| LL   | 6347   | 71.45   | 63.47   |
| LR   | 1276   | 14.36   | 12.76   |

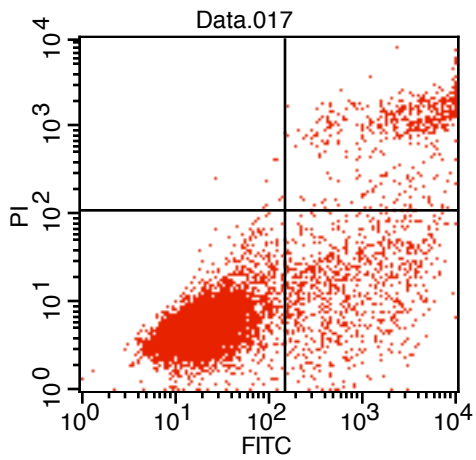

File: Data.017

| Quad | Events | % Gated | % Total |
|------|--------|---------|---------|
| UL   | 9      | 0.09    | 0.09    |
| UR   | 487    | 5.12    | 4.87    |
| LL   | 8171   | 85.88   | 81.71   |
| LR   | 847    | 8.90    | 8.47    |
